# Supplementary material
Source: PubMed Central journal article supplement (PMC8607839)
Supplement: NIHMS1684939-supplement-Supplemental.pdf [file NIHMS1684939-supplement-Supplemental.pdf]

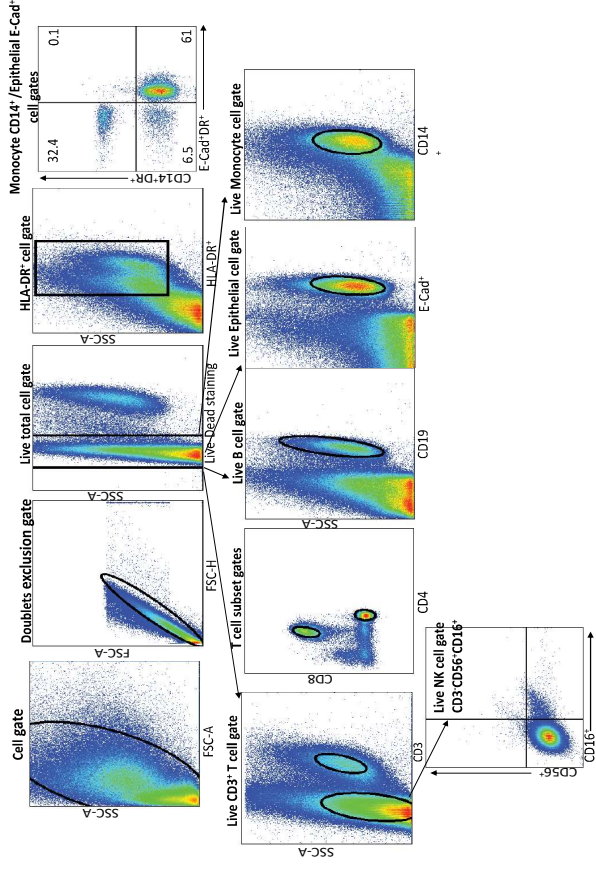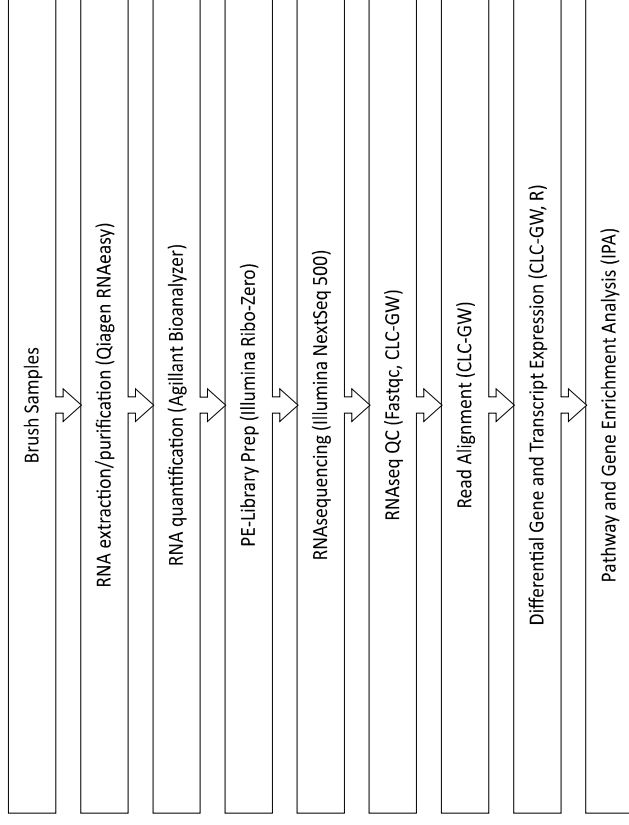

Figure S1. Gating on Airway Brush Cell Populations and RNAseq Pipeline

A) Representative flow cytometric plots of gating strategy to analyze the phenotype of the cells on airway brushes. Gating was done on airway brush cells creating a cell gate on FSC and SSA plot and doublet exclusion based on a FSC-A and FSC-H plot, with singlets inclusion, and live/cells, after we exclude the death cells. Live/Dead Fixable Blue Dead-Cell Stain was used for gating on viable cells. From live cells gate gating was done on HLA-DR+ cells followed by monocytes (CD14+HLA DR+) cells and epithelial cells (E-Cad+ HLA DR+). T cells (CD3+ or CD8+ T cell subpopulations, B cells (CD19), NK cells (CD3-CD56+CD16+) were also gated. Plots are representative from the total of the airway brushes subset of n=12 LTRs. All cells were collected for flow cytometric analysis with a range of 0.5-1x10<sup>6</sup> total events/condition collected using LSR Fortessa-cytometer with a UV-Laser (BD Biosciences) Data analysis and graphic representations were done with FlowJo v.10 (TreeStar, Ashland, OR). B) Algorithm for RNAseq pipeline analysis.

|              |            |            |              |            |            |            |            |            |            |            |
|--------------|------------|------------|--------------|------------|------------|------------|------------|------------|------------|------------|
| AL627309.3   | SIX3-AS1   | MUC13      | ATPB10B      | TRBV7-9    | SAA4       | ANKRD20A9P | DUOX2      | KRT13      | VSTM1      | U62317.2   |
| MTCO1P12     | SIX3       | TF         | GABRG2       | DEFA1      | SAA2-SAA4  | EPSTI1     | DUOXA2     | KRT16      | KIR3DX1    | U62317.5   |
| AJAP1        | PLEK       | LINC02000  | AC034199.1   | DEFA3      | SAA2       | CPB2       | C15orf48   | SLC4A1     | FCAR       | KLHDC7B    |
| TNFRSF9      | LINC01888  | SHOX2      | LINC01366    | OR7E125P   | SAA1       | SCEL       | AC025580.1 | HOXB1      | AC245128.3 | GLRA2      |
| SLC2A5       | DYSF       | AC008040.2 | SNORA74B     | DEFB4A     | NAV2-AS1   | OR4K2      | SCG3       | HOXB-AS1   | SYT5       | AC131011.1 |
| TNFRSF8      | LINC01293  | CHRD       | ADAMTS2      | AC011008.2 | C11orf96   | RNASE2     | PRTG       | LINC02086  | PTPRH      | CPXCR1     |
| ARHGEF19-AS1 | AC244205.2 | AC068631.1 | AL512329.2   | LG13       | SYT13      | CEBPE      | AQP9       | IGF2BP1    | AL121757.1 | DRP2       |
| PADI4        | IGKC       | FETUB      | OFCC1        | ADAMDEC1   | CHST1      | GZMH       | GCNT3      | TMEM100    | SNORD17    | TCEAL2     |
| PLA2G2D      | IGKV4-1    | AC007920.2 | EDN1         | IDO1       | MS4A3      | GZMB       | CSPG4P13   | CA4        | MYBL2      | CLDN2      |
| CDA          | IGKV1-5    | LINC01983  | ASS1P1       | AC007991.4 | LRRC32     | NOVA1      | ADAMTS7P3  | SOCS3      | PI3        | AFF2       |
| SMPDL3B      | IGKV1-9    | FGFBP1     | AL049543.1   | IDO2       | B3GNT6     | AL133304.2 | BCL2A1     | DLGAP1-AS5 | MMP9       | FATE1      |
| LINC01225    | IGKV3-11   | NWD2       | OR211P       | TCIM       | MYO7A      | AL139099.5 | AL15871.5  | POTEC      | SLC04A1    | TKTL1      |
| LINC01226    | IGKV3-15   | AC111000.4 | UBD          | ANK1       | MMP8       | RN7SL1     | HAPLN3     | LOXHD1     | TNFRSF6B   | CTAG2      |
| CSF3R        | IGKV1-16   | CSN1S1     | HLA-G        | AC131902.1 | MMP1       | AL133241.1 | LINC02207  | LIPG       | FP671120.3 |            |
| DMBX1        | IGKV1-17   | MUC7       | TRIM31       | AC091173.1 | MMP12      | NGB        | HBA1       | ALPK2      | FP236383.2 |            |
| PDE4B        | IGKV3-20   | JCHAIN     | LINC00243    | AC079209.1 | CARD17     | SERPINA3   | MEFV       | OACYLP     | FP236383.3 |            |
| PTGES3P1     | IGKV1-27   | CXCL8      | DPCR1        | IMPA1P1    | HTR3A      | TCL6       | AC138969.2 | AC010507.1 | TPTE       |            |
| VCAM1        | IGKV2-30   | PF4        | CFB          | ANXA13     | NNMT       | AL161669.1 | AC008938.1 | KF456478.1 | SAMS1      |            |
| AMY2A        | IGKV1-33   | EREG       | C6orf222     | MTRF1LP2   | GRIK4      | EXOC3L4    | LINC02195  | SEMA6B     | AF130351.1 |            |
| AC092506.1   | IGKV1D-39  | CXCL9      | TREML2       | COL22A1    | AP004147.1 | IGHA2      | ZG16       | CD70       | OLIG2      |            |
| EPS8L3       | IGKV2D-28  | CXCL10     | TREML3P      | LYPD2      | OR8D1      | IGHE       | ITGAD      | TNFSF14    | OLIG1      |            |
| TMIGD3       | LINC00342  | CXCL11     | PGC          | SLURP2     | NTM        | IGHG4      | AC093520.1 | AC008878.1 | TSPEAR-AS1 |            |
| BCL2L15      | IL1R2      | CXCL13     | AL133375.1   | AC017067.1 | AC006063.2 | IGHG2      | AC007342.3 | FCER2      | SMPD4P1    |            |
| U1_10        | IL18RAP    | SPP1       | PLA2G7       | SPATA31A6  | CLEC4C     | IGHA1      | ADGRG3     | TGFBR3L    | IGLV4-69   |            |
| GJA5         | AC140479.7 | AC097478.1 | TAAR3P       | SPATA31A7  | SLC2A14    | IGHG1      | CMTM2      | CCL25      | IGLV8-61   |            |
| S100A9       | IL1B       | AC108067.1 | IL22RA2      | LINC01506  | SLC2A3     | IGHG3      | PKD1L2     | OR7E25P    | IGLV6-57   |            |
| S100A12      | NCKAP5-IT1 | TNIP3      | AL591468.1   | RORB       | CLEC4E     | IGHM       | FENDRR     | AC011472.2 | IGLV1-47   |            |
| S100A8       | CXCR4      | IL21       | RAET1L       | NUTM2F     | GRIN2B     | IGHV1-2    | CA5A       | AC008481.3 | IGLV1-44   |            |
| NPR1         | TNFAIP6    | IL21-AS1   | TAGAP        | ORM1       | SLCO1B3    | IGHV1-3    | SLC22A31   | SLC5A5     | IGLV1-40   |            |
| C1orf61      | FAP        | AC139720.1 | MAS1         | FUT7       | SLCO1B7    | IGHV4-4    | TUBB3      | AC010335.3 | IGLV3-25   |            |
| FCRL5        | XIRP2      | AC109811.1 | ALG1L5P      | IL2RA      | SLCO1B1    | IGHV2-5    | DOC2B      | AC123912.2 | IGLV2-23   |            |
| FCRL3        | PTCHD3P2   | FGA        | IL6          | C10orf126  | BCAT1      | IGHV3-7    | LINC02091  | MAG        | IGLV3-21   |            |
| FCRL2        | HAGLR      | FGG        | URGCP-MRPS24 | DRGX       | SMCO2      | IGHV3-11   | AC118754.2 | FFAR3      | IGLV3-19   |            |
| OR6N2        | CCDC141    | RXFP1      | AC004847.1   | PCDH15     | AC009509.1 | IGHV3-15   | ALOX15B    | GPR42      | IGLV2-14   |            |
| ACKR1        | IMPDH1P10  | NEIL3      | RAMP3        | SERGN      | LINC02471  | IGHV3-21   | AURKB      | FFAR2      | IGLV2-11   |            |
| FCGR3B       | CTLA4      | CLDN22     | CCL24        | HKDC1      | ANKRD33    | IGHV3-23   | SNORD3A    | DPF1       | IGLV2-8    |            |
| FCRLA        | CXCR2P1    | F11        | DLX6-AS1     | PLAU       | KRT75      | IGHV3-30   | MTRNR2L1   | LGALS17A   | IGLV3-1    |            |
| SLAMF6P1     | CXCR2      | F11-AS1    | ZAN          | C10orf55   | KRT6B      | IGHV4-31   | CCL2       | CLC        | IGLL5      |            |
| LMX1A        | CXCR1      | MTNR1A     | MUC3A        | LIPN       | KRT6A      | IGHV3-33   | CCL7       | MIA        | IGLC1      |            |
| SELL         | CCL20      | SLC9A3     | AC254629.1   | LIPM       | GPR84      | IGHV4-34   | CCL8       | CEACAM5    | IGLC2      |            |
| IGFN1        | ATP2B2     | C7         | SERPINE1     | ANKRD22    | METTL7B    | IGHV4-39   | HEATR9     | CD79A      | IGLC3      |            |
| IL10         | CYP8B1     | AC112198.2 | RELN         | CEP55      | LINC02389  | IGHV3-48   | CCL3       | CD177      | ADORA2A    |            |
| C4BPB        | LINC00694  | IL31RA     | AC004917.1   | MKI67      | IFNG       | IGHV3-49   | CCL4       | PGLYRP1    | UPB1       |            |
| C4BPA        | CCR3       | AC109454.3 | SLC26A4-AS1  | NLRP6      | AC069228.1 | IGHV5-51   | CCL3L3     | PTGIR      | OSM        |            |
| HSD11B1      | CCRL2      | SLC25A48   | SLC26A4      | OR52K1     | CMKLR1     | IGHV3-53   | CCL4L2     | IL4I1      | C22orf42   |            |
| AL606534.2   | PROK2      | SPINK1     | WNT2         | HBB        | SDS        | IGHV4-59   | TBC1D3C    | KLK7       | CSF2RB     |            |
| OR2C3        | LINC00877  | SCGB3A2    | LEP          | HNG1       | RNU4-2     | IGHV1-69D  | TBC1D3E    | AC018755.2 | SSTR3      |            |
| TRIM58       | AC106712.1 | CAMK2A     | CPA4         | OR52N2     | HCAR3      | IGHV3-72   | CSF3       | SIGLEC14   | APOBEC3A   |            |
| OR2M3        | ZBED2      | SLC36A3    | AC083862.2   | ADM        | AC079949.2 | IGHV3-74   | AC004585.1 | FPR1       | Z82214.2   |            |
| LINC00211    | CD200R1L   | NIPAL4     | TRBV6-2      | AC073172.1 | GLT1D1     | AC091057.3 | KRT38      | FPR2       | IL17REL    |            |

Figure S2. All genes identified in differential gene expression analysis for CLAD versus non-CLAD LTRs. The 513 included genes had FDR p-value <0.05 and log2 fold-change  $\geq 1.5$  or  $\leq -1.5$ .

|                  | CLAD no ACR vs Non-CLAD no ACR |             | CLAD ACR vs CLAD no ACR |             |
|------------------|--------------------------------|-------------|-------------------------|-------------|
|                  | Fold Change                    | FDR p-value | Fold Change             | FDR p-value |
| <i>IDO1</i>      | 15.82                          | 9.27E-9     | 3.77                    | 0.08        |
| <i>ADAMDEC1</i>  | 4.53                           | 3.04E-4     | 4.45                    | 3.21E-3     |
| <i>TNFRSF6B</i>  | 216.53                         | 2.91E-11    | 1.82                    | 0.83        |
| <i>SLC5A5</i>    | 17.85                          | 2.12E-8     | -1.31                   | 0.89        |
| <i>MMP9</i>      | 6.06                           | 1.43E-4     | 5.89                    | 2.01E-3     |
| <i>SERPINA3</i>  | 9.01                           | 1.83E-5     | -1.07                   | 0.98        |
| <i>IGKC</i>      | 7.69                           | 1.69E-4     | 3.63                    | 0.11        |
| <i>IGHA1</i>     | 5.83                           | 1.12E-3     | 1.97                    | 0.58        |
| <i>BCL2L15</i>   | 2.83                           | 1.95E-9     | 1.31                    | 0.98        |
| <i>MUC13</i>     | 4.69                           | 3.92E-7     | 1.27                    | 0.83        |
| <i>C15orf48</i>  | 3.94                           | 9.85E-4     | 3.15                    | 0.04        |
| <i>FCAR</i>      | 6.81                           | 9.82E-5     | 2.31                    | 0.37        |
| <i>KRT6B</i>     | 7.25                           | 3.75E-7     | -1.43                   | 0.80        |
| <i>MIA</i>       | 3.16                           | 3.20E-5     | 1.29                    | 0.79        |
| <i>IGHM</i>      | 15.53                          | 8.58E-6     | 4.05                    | 0.15        |
| <i>CXCL9</i>     | 6.51                           | 1.59E-4     | 7.87                    | 5.14E-4     |
| <i>CXCL13</i>    | 15.47                          | 2.19E-4     | 4.23                    | 0.21        |
| <i>CXCR4</i>     | 3.05                           | 3.26E-3     | 3.71                    | 2.84E-3     |
| <i>SAA2-SAA4</i> | 5.09                           | 4.73E-6     | 1.75                    | 0.48        |
| <i>CLC</i>       | 4.91                           | 0.01        | 9.81                    | 4.13E-4     |
| <i>SAA2</i>      | 6.27                           | 3.22E-7     | 1.09                    | 0.97        |
| <i>ATP10B</i>    | 3.92                           | 7.62E-6     | 1.37                    | 0.73        |
| <i>CXCL8</i>     | 3.63                           | 4.53E-3     | 3.86                    | 0.01        |
| <i>TCIM</i>      | 4.19                           | 5.00E-5     | 1.34                    | 0.83        |
| <i>PTPRH</i>     | 5.37                           | 1.79E-5     | 1.30                    | 0.84        |

Figure S3 – Differential gene expression by CLAD and acute cellular rejection (ACR): A comparison of CLAD no ACR vs non-CLAD no ACR revealed findings very similar to the primary analysis for the top 25 genes. Comparing the CLAD ACR vs CLAD no ACR LTRs found 7/25 of the top genes were upregulated in CLAD with ACR by FDR p-value.

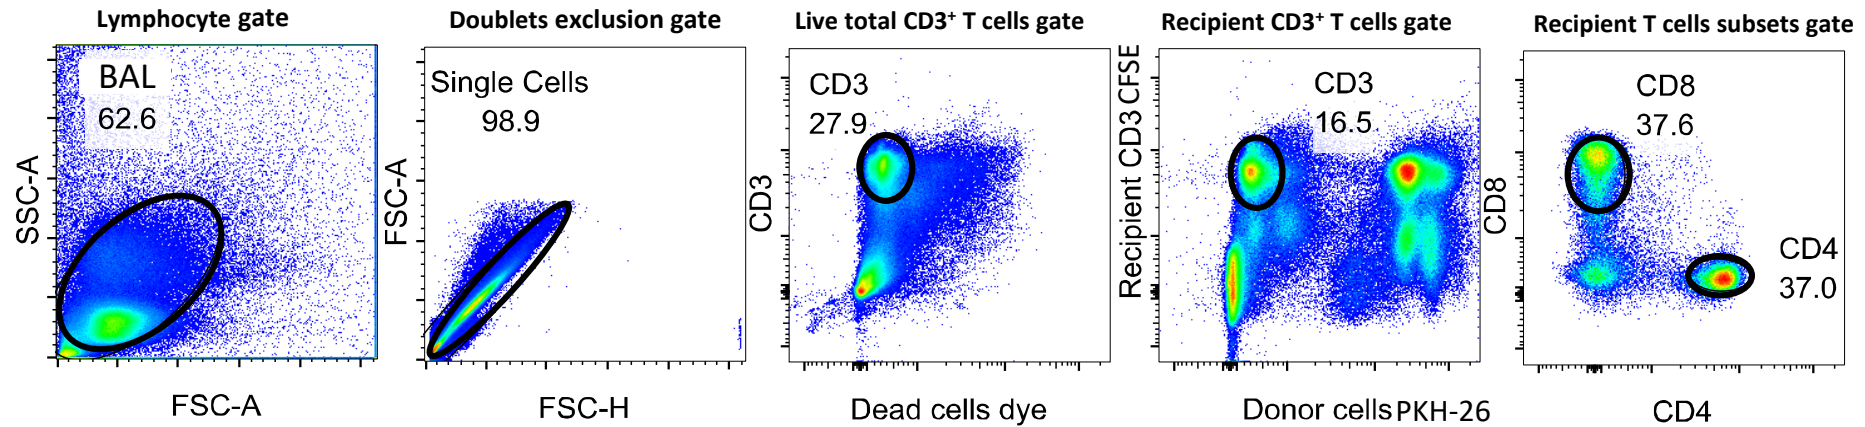

Figure S4: Gating strategy to analyze the allospecific CD8<sup>+</sup> or CD4<sup>+</sup> T cell alloimmune responses. Representative flow cytometric plots of gating strategy to analyze the allospecific CD8<sup>+</sup> or CD4<sup>+</sup> T cells from LTR patient. Gating was done on BAL cells creating a lymphocyte gate on FSC and SSA plot and doublet exclusion based on a FSC-A and FSC-H plot, with singlets inclusion, and live/CD3<sup>+</sup> T cells, after we exclude the donor cells labeled with PKH-26 (PE channel) dye and gated on recipient live CD3<sup>+</sup> labeled with CFSE (FITC channel) and subsequently, the subpopulations of CD4<sup>+</sup> or CD8<sup>+</sup> recipient T-cells, where the flow plot numbers indicate frequencies (%). Plots are representative from the subset of n=6 LTRs, with CLAD and n=6 LTRs with non-CLAD. All cells were collected for flow cytometric analysis with a range of 0.5-1x10<sup>6</sup> total events/condition collected using LSR Fortessa-cytometer with a UV-Laser (BD Biosciences) Data analysis and graphic representations were done with FlowJo v.10 (TreeStar, Ashland, OR).
